# Supplementary material for: A Geometric Strategy Algorithm for Orthogonal Projection onto a Parametric Surface
Source: Springer Nature journal article supplement (doi:10.1007/s11390-019-1967-z), 2019-11-01
Supplement: 11390_2019_1967_MOESM1_ESM.pdf [file 11390_2019_1967_MOESM1_ESM.pdf]

# A Geometric Strategy Algorithm for Orthogonal Projection onto a Parametric Surface

Xiaowu Li, Zhinan Wu, Feng Pan  
Member, CCF, Juan Liang, Jia-Feng  
Zhang, Linke Hou

Li XW, Wu ZN, Pan F et al. A geometric strategy algorithm for orthogonal projection onto a parametric surface. JOURNAL OF COMPUTER SCIENCE AND TECHNOLOGY 34(6): 1279–1293 Nov. 2019. DOI 10.1007/s11390-019-1967-z

# Description of Geometric Strategy Algorithm (GSA)

- **Input:** the initial parametric value  $t_0 = (u_0, v_0)^T$ , parametric surface  $\mathbf{s}(u, v)$  and test point  $\mathbf{p}$ .
- **Output:** the final orthogonal projection point  $\mathbf{P}_\Gamma$ .
- **Procedures**
  - **Step 1.** Input the initial iterative parametric value  $t_0$  .

# Description of Geometric Strategy Algorithm (GSA)

- **Step 2.** Use the iterative Formula (20), compute the parametric incremental value  $\Delta t = (\Delta u, \Delta v)^T$ , and update  $t_0 + \Delta t$  to  $t_0$ , namely,  $t_0 = t_0 + \Delta t$ .
- **Step 3.** Check whether the norm of difference between the former  $t_0$  and the latter  $t_0$  is near 0 ( $\|\Delta t\| < \varepsilon$ ). If so, end this algorithm, if not, go to **Step 2**.

# The Iterative Formula (20) of the GSA

$$\begin{cases} \Delta u = \frac{C_4 G - C_5 F}{EG - F^2}, \\ \Delta v = -\frac{C_4 F - C_5 E}{EG - F^2}. \end{cases}$$

# Graphic demonstration for the GSA

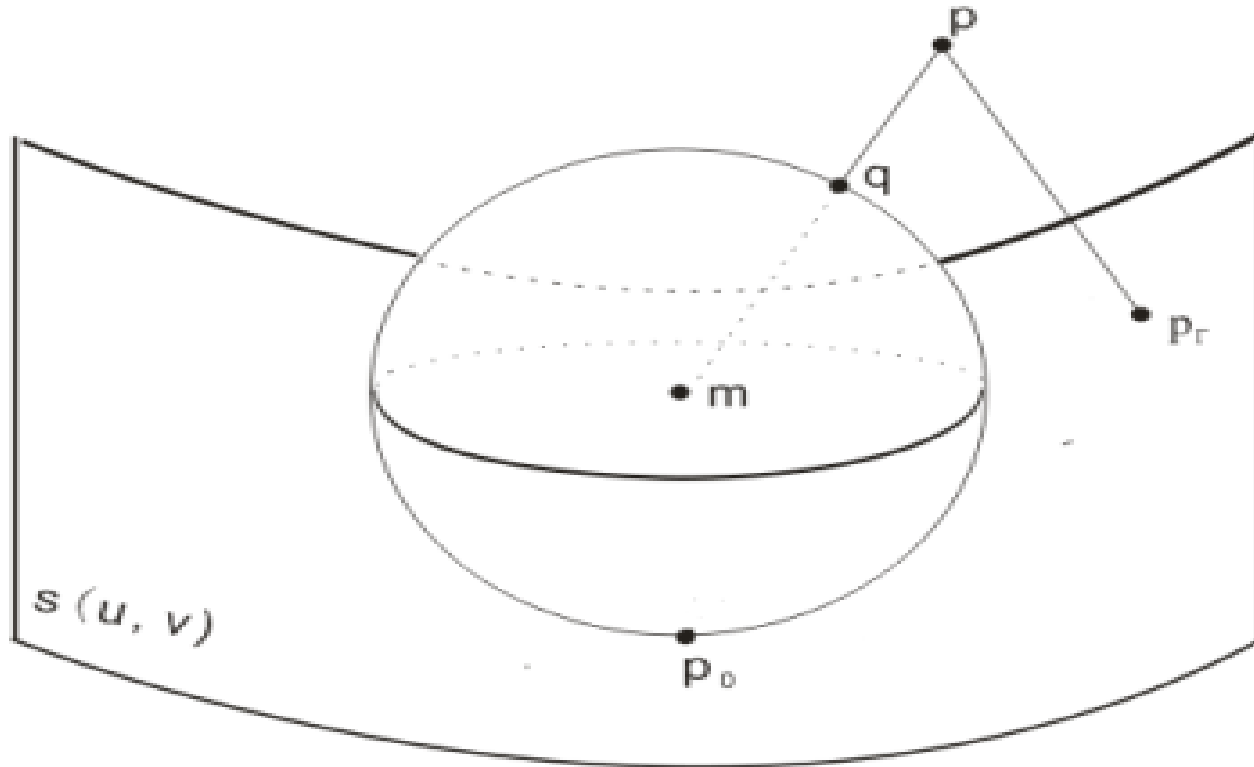

# The Superiority of the GSA over Existing Methods

- Firstly, the GSA converges faster than existing methods, such as the method to turn the problem into a root-finding of nonlinear system, subdividing methods, clipping methods, geometric methods (tangent vector and geometric curvature) and hybrid second order method, etc. Specially, it converges faster than the classical Newton's iterative method.
- Secondly, the **GSA** is independent of the initial iterative value, which we prove in Theorem 1.
